# Supplementary material for: Maternal Serum Albumin Redox State Is Associated with Infant Birth Weight in Japanese Pregnant Women
Source: Nutrients. 2021 May 22;13(6):1764. doi: 10.3390/nu13061764 (PMC8224550; doi:10.3390/nu13061764)
Supplement: Supplementary file 1 [file nutrients-13-01764-s001.zip › nutrients-1201156-supplementary.pdf]

**Figure S1 Body weights and weight gain of pregnant rats.**

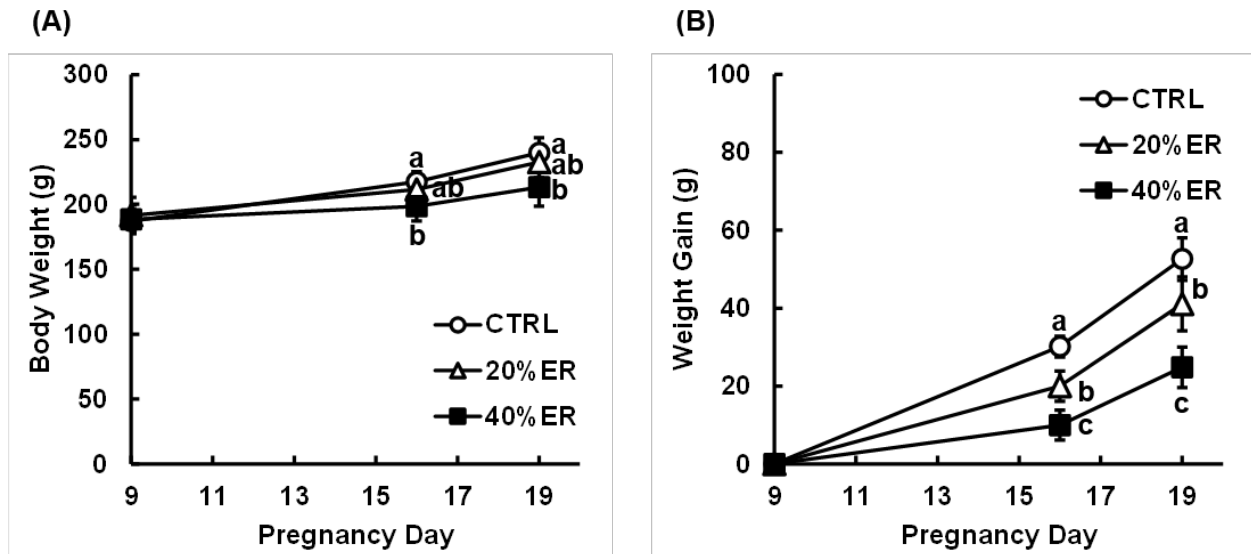

Body weights (a) and weight gain (b) of pregnant rats were measured on the pregnancy day 9 (PD9), 16, and 19. Weight gains during the experimental period were also calculated. Data are expressed as means  $\pm$  SDs ( $n = 6$ ), which were analyzed by one-way ANOVA followed by a Tukey-Kramer HSD test; at each time point, values with different letters are significantly different ( $p < 0.05$ ). CTRL, control; 20%ER, 20% energy restriction; 40%ER, 40% energy restriction.

**Table S1 Simple linear regression analyses of maternal background/gestational outcome vs infant birth weight in pregnant women.**

| Independent Variable      | R      | <i>p</i> |
|---------------------------|--------|----------|
| Maternal background       |        |          |
| Age                       | −0.028 | 0.677    |
| Height                    | 0.119  | <0.073   |
| Pre-pregnancy body weight | 0.201  | <0.01    |
| Pre-pregnancy BMI         | 0.180  | <0.01    |
| Gestational Outcome       |        |          |
| Gestation Period          | 0.457  | <0.0001  |
| Body weight at delivery   | 0.247  | <0.001   |
| Weight gain               | 0.121  | 0.068    |

BMI, body mass index.

**Table S2 Simple linear regression analyses between serum ALB redox state in the third trimester, pre-pregnancy body weight, pre-pregnancy BMI, gestation period, and body weight and delivery in pregnant women.**

|                                     | Serum ALB<br>redox state <sup>*1</sup> | Pre-pregnancy<br>body weight   | Pre-pregnancy<br>BMI           | Gestation Period              | Body weight<br>at delivery     |
|-------------------------------------|----------------------------------------|--------------------------------|--------------------------------|-------------------------------|--------------------------------|
| Serum ALB redox state <sup>*1</sup> | -                                      | R = -0.084<br><i>p</i> = 0.207 | R = -0.037<br><i>p</i> = 0.573 | R = 0.197<br><i>p</i> < 0.01  | R = -0.032<br><i>p</i> = 0.634 |
| Pre-pregnancy body weight           | R = -0.084<br><i>p</i> = 0.207         | -                              | R = 0.929<br><i>p</i> < 0.0001 | R = 0.058<br><i>p</i> = 0.384 | R = 0.915<br><i>p</i> < 0.0001 |
| Pre-pregnancy BMI                   | R = -0.037<br><i>p</i> = 0.573         | R = 0.929<br><i>p</i> < 0.0001 | -                              | R = 0.066<br><i>p</i> = 0.321 | R = 0.827<br><i>p</i> < 0.0001 |
| Gestation Period                    | R = 0.197<br><i>p</i> < 0.01           | R = 0.058<br><i>p</i> = 0.384  | R = 0.066<br><i>p</i> = 0.321  | -                             | R = 0.099<br><i>p</i> = 0.136  |
| Body weight at delivery             | R = -0.032<br><i>p</i> = 0.634         | R = 0.915<br><i>p</i> < 0.0001 | R = 0.827<br><i>p</i> < 0.0001 | R = 0.099<br><i>p</i> = 0.136 | -                              |

<sup>\*1</sup> Analyzed in the third trimester.

ALB, albumin; BMI, body mass index.

**Table S3 Birth outcomes of pregnant rats.**

| Outcome                    | CTRL                   | 20% ER                  | 40% ER                 |
|----------------------------|------------------------|-------------------------|------------------------|
| Litter weight (g)          | 40.2 ± 15.6            | 45.3 ± 8.6              | 40.5 ± 7.7             |
| Litter size                | 8.3 ± 3.3              | 10.0 ± 2.2              | 9.7 ± 2.3              |
| Birth weight in the litter | 4.9 ± 0.2 <sup>a</sup> | 4.6 ± 0.2 <sup>ab</sup> | 4.2 ± 0.3 <sup>b</sup> |

Data are expressed as means ± SD (n = 6), which were analyzed by one-way ANOVA followed by a Tukey-Kramer HSD test; values with different letters are significantly different ( $p < 0.05$ ). CTRL, control; 20%ER, 20% energy restriction; 40%ER, 40% energy restriction.
